# Supplementary material
Source: PubMed Central journal article supplement (PMC7953947)
Supplement: deab026_Supplementary_Data.pdf [file deab026_Supplementary_Data.pdf]

**Supplementary Table S1 Comparison of normospermic versus azoospermic men in the study sample (N = 40, three oligospermic patients were excluded from analysis).**

|                                             | Normospermics <sup>a</sup><br>(N = 32, 74.4%)         | Crypto-azoospermics <sup>b</sup><br>(N = 8, 25.6%) | P value <sup>c</sup> |              |
|---------------------------------------------|-------------------------------------------------------|----------------------------------------------------|----------------------|--------------|
| <b>DEMOGRAPHICS</b>                         |                                                       |                                                    |                      |              |
| <b>Age (years) (median, IQR)</b>            | 50 (44–57)                                            | 59 (53–63)                                         | <b>0.049</b>         |              |
| <b>BMI (kg/m<sup>2</sup>) (median, IQR)</b> | 26.2 (23.8–30.0)                                      | 27.5 (27.0–29.4)                                   | 0.328                |              |
| <b>Hospitalization</b>                      | Nonhospitalized (n, %)                                | 11 (34.4%)                                         | 1 (12.5%)            | 0.396        |
|                                             | Hospitalized (without) (n, %)                         | 20 (62.5%)                                         | 3 (37.5%)            | 0.110        |
|                                             | ICU (n, %)                                            | 1 (3.1%)                                           | 4 (50.0%)            | <b>0.003</b> |
| <b>Oxygen therapy<sup>d</sup></b>           | No oxygen (n, %)                                      | 16 (50.0%)                                         | 2 (25.0%)            | 0.258        |
|                                             | Low flow O <sub>2</sub> therapy (n, %)                | 6 (18.9%)                                          | 2 (25.0%)            | 0.650        |
|                                             | High-flow O <sub>2</sub> —invasive ventilation (n, %) | 10 (31.3%)                                         | 4 (50.0%)            | 0.416        |

<sup>a</sup>Normospermic men are defined by a sperm count of 15 millions/mL or higher.

<sup>b</sup>Crypto-azoospermic men are defined by the absence of sperm in semen samples. Oligospermic patients (N=3), defined as men with a sperm count ranging from 0 to 15 millions/mL were excluded.

<sup>c</sup>Calculated using Chi Quadro or Fischer test for categorical variables or ANOVA test for continuous variables.

<sup>d</sup>Low Flow Oxygen Therapy includes nasal cannula, simple face mask and partial rebreather mask while High Flow Oxygen includes trans tracheal catheters, venturi mask, aerosol mask, tracheostomy collars, non-rebreathing mask with reservoir and one-way valve and high humidity face tents.

IQR: interquartile range, ICU: intensive care unit.
